# Supplementary material for: Rising burden of gout in the UK but continuing suboptimal management: a nationwide population study
Source: PubMed Central journal article supplement — Ann Rheum Dis. 2014 Jan 15;74(4):661–7. doi: 10.1136/annrheumdis-2013-204463 (PMC4392307; doi:10.1136/annrheumdis-2013-204463), 2014-01-15

## Supplementary material

Supplementary Table 1. Read codes to identify prevalent and incident cases of gout

| Read codes | Description                              | Prevalent definition | Incident definition |
|------------|------------------------------------------|----------------------|---------------------|
| 1443       | H/O: gout                                | +                    |                     |
| 6691       | Initial gout assessment                  | +                    |                     |
| 6692       | Follow-up gout assessment                | +                    |                     |
| 6693       | Joints gout affected                     | +                    | +                   |
| 6695       | Date gout treatment started              | +                    |                     |
| 6696       | Date of last gout attack                 | +                    |                     |
| 6697       | Gout associated problems                 | +                    |                     |
| 6698       | Gout drug side effects                   | +                    |                     |
| 6699       | Gout treatment changed                   | +                    |                     |
| 669..00    | Gout monitoring                          | +                    |                     |
| 669A.00    | Date gout treatment stopped              | +                    |                     |
| 669Z.00    | Gout monitoring NOS                      | +                    |                     |
| C34..00    | Gout                                     | +                    | +                   |
| C340.00    | Gouty arthropathy                        | +                    | +                   |
| C341.00    | Gouty nephropathy                        | +                    | +                   |
| C341z00    | Gouty nephropathy NOS                    | +                    | +                   |
| C342.00    | Idiopathic gout                          | +                    | +                   |
| C345.00    | Gout due to impairment of renal function | +                    | +                   |
| C34y.00    | Other specified gouty manifestation      | +                    | +                   |
| C34y000    | Gouty tophi of ear                       | +                    | +                   |
| C34y100    | Gouty tophi of heart                     | +                    | +                   |
| C34y200    | Gouty tophi of other sites               | +                    | +                   |
| C34y300    | Gouty iritis                             | +                    | +                   |
| C34y400    | Gouty neuritis                           | +                    | +                   |
| C34y500    | Gouty tophi of hand                      | +                    | +                   |
| C34yz00    | Other specified gouty manifestation NOS  | +                    | +                   |
| C34z.00    | Gout NOS                                 | +                    | +                   |
| G557300    | Gouty tophi of heart                     | +                    | +                   |
| N023.00    | Gouty arthritis                          | +                    | +                   |
| N023100    | Gouty arthritis of the shoulder region   | +                    | +                   |
| N023200    | Gouty arthritis of the upper arm         | +                    | +                   |
| N023300    | Gouty arthritis of the forearm           | +                    | +                   |
| N023400    | Gouty arthritis of the hand              | +                    | +                   |
| N023600    | Gouty arthritis of the lower leg         | +                    | +                   |
| N023700    | Gouty arthritis of the ankle and foot    | +                    | +                   |
| N023800    | Gouty arthritis of toe                   | +                    | +                   |
| N023x00    | Gouty arthritis of multiple sites        | +                    | +                   |
| N023y00    | Gouty arthritis of other specified site  | +                    | +                   |
| N023z00    | Gouty arthritis NOS                      | +                    | +                   |

Supplementary figure 1. The relationships between length of data contribution and (a) crude prevalence (b) age- and sex-adjusted prevalence (c) crude incidence and (d) age- and sex-standardised incidence of gout during 1997 to 2012. (blue: 0–3; red: 4–6; green: 7–9; purple:  $\geq 10$  years of data contribution).

(a)

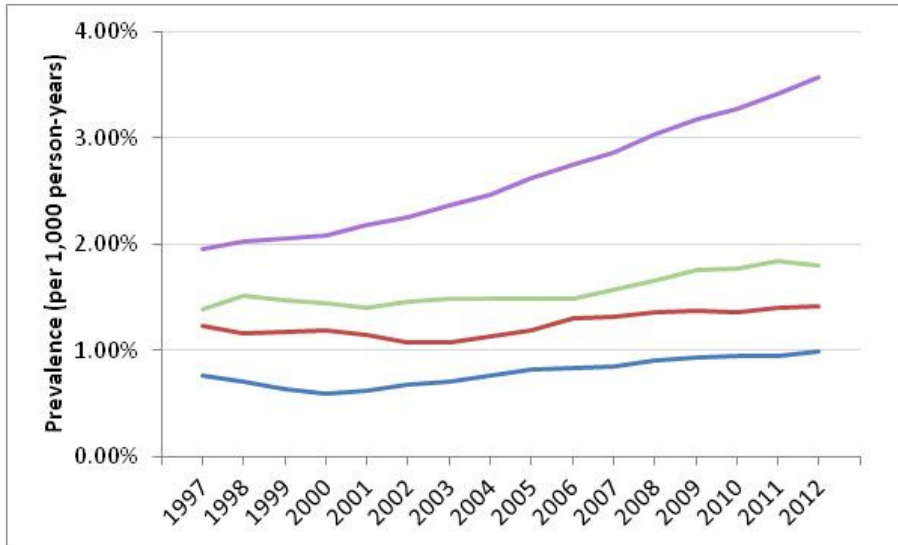

(b)

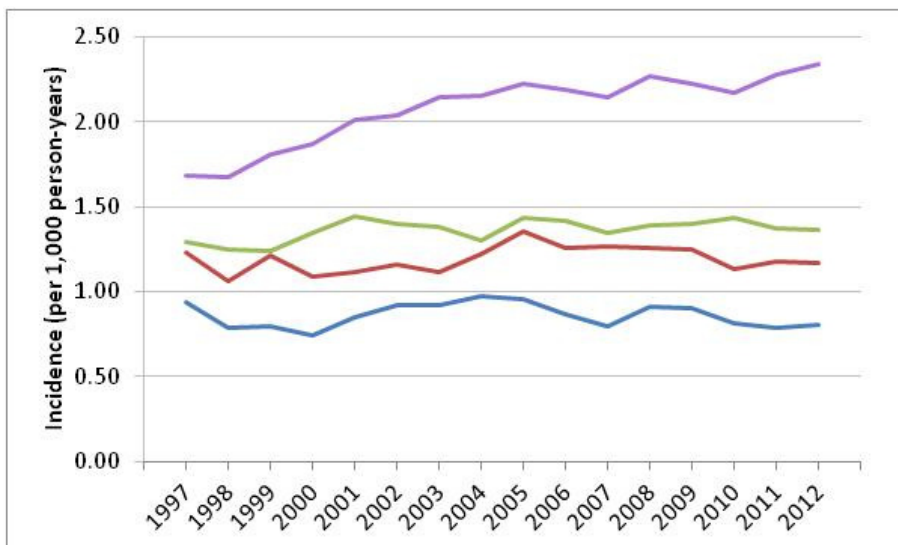

Supplementary figure 2. Proportions of (a) eligible population for prevalence and (b) at-risk population for incidence by length of data-contribution (blue: 1-3; red: 4-6; green: 7-9; purple:  $\geq 10$  years of data contribution)

(a)

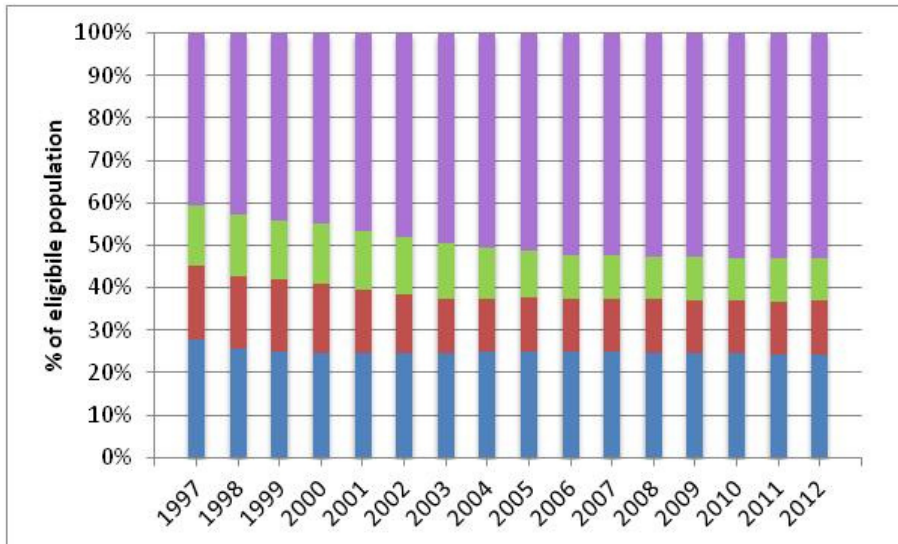

(b)

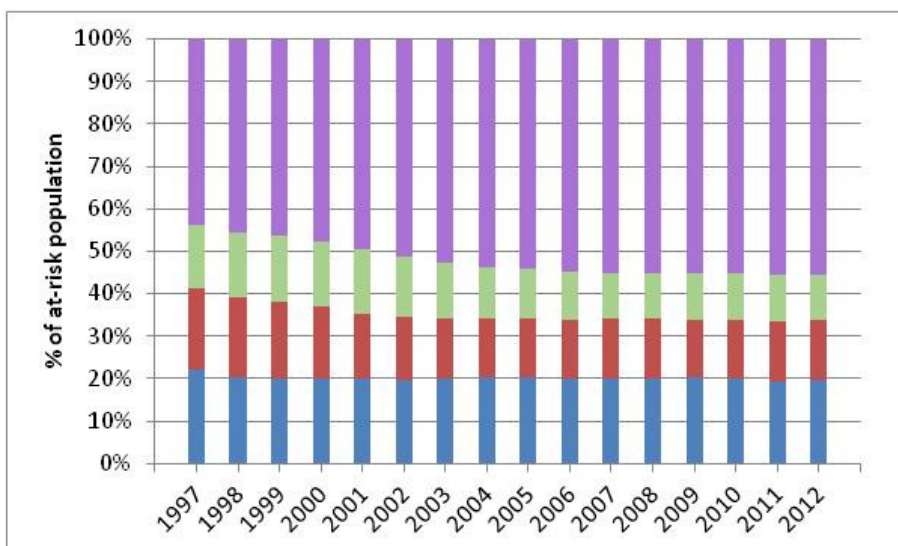

Supplement: annrheumdis-2013-204463-s1.pdf [file annrheumdis-2013-204463-s1.pdf]
